# Supplementary material for: Salt Stress Tolerance in Casuarina glauca: Insights from the Branchlets Transcriptome
Source: MDPI journal article supplement (doi:10.3390/plants11212942), 2022-11-01
Supplement: s1 [file s1]

**Table S2.** Quantification of basic quality metrics *de novo* transcriptome assembly of *Casuarina glauca*. Samples of *C. glauca* nodulated by nitrogen-fixing *Frankia casuarinae* Thr (NOD<sup>+</sup>) and non-nodulated plants supplied with KNO<sub>3</sub> (KNO<sub>3</sub><sup>+</sup>), grown at 0, 200, 400, and 600 mM NaCl, were combined to perform a *de novo* transcriptome assembly using Trinity software.

| Metrics                      | Values    |
|------------------------------|-----------|
| Total assembled contigs      | 181484    |
| Smallest contig              | 183       |
| Largest contig               | 17867     |
| Total assembled bases        | 289780263 |
| Total assembled genes        | 86202     |
| Average contig length        | 1597      |
| Median contig length         | 1036      |
| # Contig sequences under 200 | 7         |
| # Contig sequences over 1k   | 92205     |
| # Contig sequences over 10k  | 170       |
| # Contig sequences with ORF  | 76648     |
| % Mean ORF                   | 40        |
| N90                          | 727       |
| N70                          | 1904      |
| N50                          | 2792      |
| N40                          | 3260      |
| N30                          | 3805      |
| N20                          | 4520      |
| N10                          | 5729      |
| % GC                         | 41        |
