# Supplementary material for: Salt Stress Tolerance in Casuarina glauca: Insights from the Branchlets Transcriptome
Source: MDPI journal article supplement (doi:10.3390/plants11212942), 2022-11-01
Supplement: s1 [file s1]

**Table S5.** List of differentially expressed genes (DEGs) in both non-nodulated *Casuarina glauca* plants supplied with KNO<sub>3</sub> (KNO<sub>3</sub><sup>+</sup>) and nodulated by nitrogen-fixing *Frankia casuarinae* Thr (NOD<sup>+</sup>), grown in 400 mM NaCl relative to the control (0 mM NaCl). NCBI gene symbol and Protein Name, retrieved from NBCI blastx command line tool using UniprotKB/Swissprot database, and Log<sub>2</sub>FC. DEGs were detected by DESeq, NOISeq and edgeR analysis with a False Discovery Rate < 0.05.

| Gene Symbol   | Protein Name                                     | log <sub>2</sub> FC |                  |
|---------------|--------------------------------------------------|---------------------|------------------|
|               |                                                  | KNO3 <sup>+</sup>   | NOD <sup>+</sup> |
| Upregulated   |                                                  |                     |                  |
| N/A           | Unknown protein                                  | 2.64                | 2.62             |
| SDI1          | Protein SULFUR DEFICIENCY-INDUCED 1              | 3.00                | 3.46             |
| HSP70         | Heat shock 70 kDa protein                        | 3.36                | 3.30             |
| N/A           | Unknown protein                                  | 3.58                | 2.96             |
| N/A           | Unknown protein                                  | 4.13                | 3.81             |
| Downregulated |                                                  |                     |                  |
| RL5           | Protein RADIALIS-like 5                          | -5.93               | -7.79            |
| YAH3          | Histone H3.2                                     | -5.48               | -3.91            |
| FLA12         | Fasciclin-like arabinogalactan protein 12        | -5.05               | -4.54            |
| CCD8          | Carotenoid cleavage dioxygenase 8, chloroplastic | -5.03               | -7.25            |
| N/A           | Unknown protein                                  | -5.00               | -6.33            |
| PER64         | Peroxidase 64                                    | -4.89               | -5.98            |
| ROMT          | Trans-resveratrol di-O-methyltransferase         | -4.79               | -3.73            |
| GH3.2         | Indole-3-acetic acid-amido synthetase GH3.2      | -4.64               | -3.41            |
| N/A           | Lectin                                           | -4.60               | -3.64            |

|            |                                                                             |       |       |
|------------|-----------------------------------------------------------------------------|-------|-------|
| PME6       | Probable pectinesterase/pectinesterase inhibitor 6                          | -4.22 | -5.27 |
| N/A        | Unknown protein                                                             | -3.88 | -3.43 |
| N/A        | Unknown protein                                                             | -3.84 | -3.91 |
| N/A        | Unknown protein                                                             | -3.75 | -3.39 |
| LRK10L-1.4 | LEAF RUST 10 DISEASE-RESISTANCE LOCUS RECEPTOR-LIKE PROTEIN KINASE-like 1.4 | -3.70 | -3.18 |
| PBL9       | Probable serine/threonine-protein kinase PBL9                               | -3.70 | -2.77 |
| FLS2       | LRR receptor-like serine/threonine-protein kinase FLS2                      | -3.61 | -3.63 |
| N/A        | Unknown protein                                                             | -3.53 | -3.28 |
| N/A        | Unknown protein                                                             | -3.51 | -4.12 |
| N/A        | Unknown protein                                                             | -3.42 | -4.09 |
| N/A        | Unknown protein                                                             | -3.32 | -3.91 |
| SOT15      | Cytosolic sulfotransferase 15                                               | -3.21 | -3.26 |
| LECRK91    | L-type lectin-domain containing receptor kinase IX.1                        | -3.20 | -3.50 |
| N/A        | Unknown protein                                                             | -3.19 | -2.87 |
| N/A        | Unknown protein                                                             | -3.06 | -2.98 |
| IRX15-L    | Protein IRX15-LIKE                                                          | -3.03 | -2.97 |
| GAE6       | UDP-glucuronate 4-epimerase 6                                               | -2.65 | -2.86 |
| RL3        | Protein RADIALIS-like 3                                                     | -2.62 | -4.26 |

---
