# Supplementary material for: Salt Stress Tolerance in Casuarina glauca: Insights from the Branchlets Transcriptome
Source: MDPI journal article supplement (doi:10.3390/plants11212942), 2022-11-01
Supplement: s1 [file s1]

**Table S6.** List of differentially expressed genes (DEGs) in both non-nodulated *Casuarina glauca* plants supplied with KNO<sub>3</sub> (KNO<sub>3</sub><sup>+</sup>) and nodulated by nitrogen-fixing *Frankia casuarinae* Thr (NOD<sup>+</sup>), grown in 600 mM NaCl relative to control (0 mM NaCl). NCBI gene symbol and Protein Name, retrieved from NBCI blastx command line tool using UniprotKB/Swissprot database, and Log<sub>2</sub>FC. DEGs were detected by DESeq, NOISeq and edgeR analysis with a False Discovery Rate < 0.05.

| Gene Symbol   | Protein Name                                    | log <sub>2</sub> FC |                  |
|---------------|-------------------------------------------------|---------------------|------------------|
|               |                                                 | KNO3 <sup>+</sup>   | NOD <sup>+</sup> |
| Upregulated   |                                                 |                     |                  |
| N/A           | Unknown protein                                 | 2.49                | 2.83             |
| HSP70         | Heat shock 70 kDa protein                       | 3.12                | 2.73             |
| SAT           | Stemmadenine O-acetyltransferase                | 3.39                | 2.70             |
| DTX56         | Protein DETOXIFICATION 56                       | 3.39                | 2.93             |
| N/A           | Unknown protein                                 | 3.44                | 2.20             |
| N/A           | Unknown protein                                 | 3.49                | 2.78             |
| MAKR6         | Probable membrane-associated kinase regulator 6 | 4.37                | 2.86             |
| N/A           | Unknown protein                                 | 4.52                | 3.70             |
| N/A           | Unknown protein                                 | 5.61                | 3.58             |
| Downregulated |                                                 |                     |                  |
| N/A           | Lectin                                          | -6.60               | -5.64            |
| LAC22         | Laccase-22                                      | -6.46               | -5.18            |
| N/A           | Unknown protein                                 | -6.46               | -6.24            |
| N/A           | Seed lectin                                     | -6.39               | -4.70            |
| SERK4         | Somatic embryogenesis receptor kinase 4         | -5.95               | -3.97            |
| RL5           | Protein RADIALIS-like 5                         | -5.93               | -7.79            |

|            |                                                                             |       |       |
|------------|-----------------------------------------------------------------------------|-------|-------|
| LECRK91    | L-type lectin-domain containing receptor kinase IX.1                        | -5.78 | -5.09 |
| N/A        | Unknown protein                                                             | -5.75 | -4.39 |
| LRK10L-1.4 | LEAF RUST 10 DISEASE-RESISTANCE LOCUS RECEPTOR-LIKE PROTEIN KINASE-like 1.4 | -5.70 | -5.06 |
| FLA12      | Fasciclin-like arabinogalactan protein 12                                   | -5.64 | -3.86 |
| PRB1       | Pathogenesis-related protein 1                                              | -5.60 | -4.30 |
| N/A        | Unknown protein                                                             | -5.58 | -5.09 |
| WAKL9      | Wall-associated receptor kinase-like 9                                      | -5.52 | -5.04 |
| At2g40270  | Inactive receptor-like serine/threonine-protein kinase At2g40270            | -5.48 | -3.58 |
| IRX15-L    | Protein IRX15-LIKE                                                          | -5.42 | -3.46 |
| CCD8       | Carotenoid cleavage dioxygenase 8, chloroplastic                            | -5.39 | -6.13 |
| N/A        | Unknown protein                                                             | -5.36 | -2.93 |
| N/A        | Unknown protein                                                             | -5.36 | -4.23 |
| N/A        | Unknown protein                                                             | -5.26 | -6.33 |
| N/A        | Unknown protein                                                             | -5.21 | -4.00 |
| ROMT       | Trans-resveratrol di-O-methyltransferase                                    | -5.17 | -4.83 |
| N/A        | Unknown protein                                                             | -5.13 | -5.58 |
| N/A        | Unknown protein                                                             | -4.88 | -5.74 |
| N/A        | Unknown protein                                                             | -4.83 | -4.12 |
| N/A        | Unknown protein                                                             | -4.68 | -4.71 |
| N/A        | Unknown protein                                                             | -4.62 | -4.08 |
| N/A        | Unknown protein                                                             | -4.53 | -4.30 |
| N/A        | Retrovirus-related Pol polyprotein from transposon TNT 1-94                 | -4.52 | -4.46 |
| N/A        | Unknown protein                                                             | -4.49 | -3.43 |
| N/A        | Unknown protein                                                             | -4.48 | -3.95 |
| GH3.2      | Indole-3-acetic acid-amido synthetase GH3.2                                 | -4.35 | -3.05 |
| PME6       | Probable pectinesterase/pectinesterase inhibitor 6                          | -4.34 | -4.66 |

|           |                                                   |       |       |
|-----------|---------------------------------------------------|-------|-------|
| N/A       | Unknown protein                                   | -4.28 | -3.95 |
| N/A       | Unknown protein                                   | -4.21 | -3.54 |
| N/A       | Unknown protein                                   | -4.09 | -4.25 |
| N/A       | Unknown protein                                   | -4.09 | -3.75 |
| TAO1      | Disease resistance protein TAO1                   | -4.04 | -5.73 |
| N/A       | Unknown protein                                   | -4.02 | -7.00 |
| PLP2      | Patatin-like protein 2                            | -3.94 | -4.21 |
| CRRSP38   | Cysteine-rich repeat secretory protein 38         | -3.94 | -4.12 |
| N/A       | Unknown protein                                   | -3.91 | -2.88 |
| ERF112    | Ethylene-responsive transcription factor ERF112   | -3.90 | -4.66 |
| PBL9      | Probable serine/threonine-protein kinase PBL9     | -3.87 | -3.35 |
| N/A       | Unknown protein                                   | -3.83 | -4.16 |
| CCR4      | Serine/threonine-protein kinase-like protein CCR4 | -3.80 | -5.02 |
| N/A       | Unknown protein                                   | -3.80 | -4.39 |
| N/A       | Unknown protein                                   | -3.76 | -4.48 |
| N/A       | Unknown protein                                   | -3.70 | -3.91 |
| N/A       | Unknown protein                                   | -3.69 | -3.12 |
| N/A       | Unknown protein                                   | -3.66 | -3.29 |
| SAG101    | Senescence-associated carboxylesterase 101        | -3.66 | -3.88 |
| At2g27310 | F-box protein At2g27310                           | -3.64 | -3.83 |
| AATP1     | AAA-ATPase ASD, mitochondrial                     | -3.63 | -4.81 |
| N/A       | Unknown protein                                   | -3.58 | -4.17 |
| N/A       | Unknown protein                                   | -3.58 | -4.59 |
| N/A       | Unknown protein                                   | -3.56 | -2.89 |
| N/A       | Unknown protein                                   | -3.52 | -4.98 |
| N/A       | Unknown protein                                   | -3.52 | -3.55 |

|         |                                                                                   |       |       |
|---------|-----------------------------------------------------------------------------------|-------|-------|
| AOS1    | Allene oxide synthase 1, chloroplastic                                            | -3.52 | -3.77 |
| N/A     | Unknown protein                                                                   | -3.49 | -3.00 |
| RL3     | Protein RADIALIS-like 3                                                           | -3.49 | -3.40 |
| N/A     | Unknown protein                                                                   | -3.48 | -3.55 |
| SOBIR1  | Leucine-rich repeat receptor-like serine/threonine/tyrosine-protein kinase SOBIR1 | -3.37 | -4.44 |
| SOT15   | Cytosolic sulfotransferase 15                                                     | -3.36 | -4.65 |
| N/A     | Unknown protein                                                                   | -3.32 | -3.25 |
| DREB1D  | Dehydration-responsive element-binding protein 1D                                 | -3.31 | -4.73 |
| N/A     | Unknown protein                                                                   | -3.30 | -3.92 |
| N/A     | Unknown protein                                                                   | -3.26 | -3.87 |
| RGA5    | Disease resistance protein RGA5                                                   | -3.16 | -4.08 |
| N/A     | Unknown protein                                                                   | -3.16 | -2.87 |
| CXE6    | Probable carboxylesterase 6                                                       | -3.14 | -4.14 |
| NAC090  | NAC domain-containing protein 90                                                  | -3.14 | -3.49 |
| CYP74A  | Allene oxide synthase, chloroplastic                                              | -3.13 | -3.53 |
| N/A     | Unknown protein                                                                   | -3.12 | -3.19 |
| N/A     | Unknown protein                                                                   | -3.12 | -3.66 |
| WRKY70  | Probable WRKY transcription factor 70                                             | -3.12 | -3.26 |
| N/A     | Unknown protein                                                                   | -3.10 | -5.29 |
| EXO70H1 | Exocyst complex component EXO70H1                                                 | -3.10 | -3.81 |
| N/A     | Unknown protein                                                                   | -3.07 | -3.30 |
| N/A     | Unknown protein                                                                   | -3.07 | -2.98 |
| N/A     | Unknown protein                                                                   | -3.06 | -2.95 |
| LRK10   | Rust resistance kinase Lr10                                                       | -3.05 | -3.26 |
| N/A     | Unknown protein                                                                   | -3.05 | -3.19 |
| UGT76E2 | UDP-glycosyltransferase 76E2                                                      | -3.05 | -2.80 |

|           |                                                                         |       |       |
|-----------|-------------------------------------------------------------------------|-------|-------|
| PHT1-12   | Probable inorganic phosphate transporter 1-12                           | -3.04 | -3.58 |
| N/A       | Unknown protein                                                         | -3.03 | -3.29 |
| PUMP5     | Mitochondrial uncoupling protein 5                                      | -2.96 | -3.00 |
| CML37     | Calcium-binding protein CML37                                           | -2.95 | -3.60 |
| pod       | Peroxidase 15                                                           | -2.93 | -5.53 |
| N/A       | Unknown protein                                                         | -2.89 | -2.84 |
| N/A       | Unknown protein                                                         | -2.88 | -3.22 |
| N/A       | Unknown protein                                                         | -2.86 | -3.33 |
| N/A       | Unknown protein                                                         | -2.78 | -4.02 |
| PUB17     | U-box domain-containing protein 17                                      | -2.76 | -3.23 |
| N/A       | Unknown protein                                                         | -2.71 | -5.25 |
| EDS1      | Protein EDS1L                                                           | -2.70 | -3.43 |
| N/A       | Cytochrome P450 CYP736A12                                               | -2.67 | -3.46 |
| N/A       | Unknown protein                                                         | -2.65 | -4.39 |
| N/A       | Unknown protein                                                         | -2.64 | -4.26 |
| At4g03230 | G-type lectin S-receptor-like serine/threonine-protein kinase At4g03230 | -2.61 | -3.07 |
| SAP12     | Zinc finger AN1 domain-containing stress-associated protein 12          | -2.60 | -2.89 |
| N/A       | Unknown protein                                                         | -2.58 | -2.86 |
| N/A       | Unknown protein                                                         | -2.58 | -3.84 |
| PK1       | Putative receptor protein kinase ZmPK1                                  | -2.58 | -3.59 |
| N/A       | Unknown protein                                                         | -2.57 | -3.64 |
| N/A       | Unknown protein                                                         | -2.57 | -4.03 |
| N/A       | Unknown protein                                                         | -2.57 | -3.55 |
| RPP13L4   | Disease resistance RPP13-like protein 4                                 | -2.56 | -3.31 |
| N/A       | Unknown protein                                                         | -2.55 | -2.82 |
| UGT85A23  | 7-deoxyloganetin glucosyltransferase                                    | -2.54 | -3.74 |

|           |                                                                         |       |       |
|-----------|-------------------------------------------------------------------------|-------|-------|
| N/A       | Unknown protein                                                         | -2.50 | -3.22 |
| GNS1      | Glucan endo-1,3-beta-glucosidase, basic isoform                         | -2.50 | -3.32 |
| N/A       | Unknown protein                                                         | -2.49 | -3.13 |
| N/A       | Unknown protein                                                         | -2.49 | -3.58 |
| N/A       | Unknown protein                                                         | -2.44 | -4.23 |
| DTX49     | Protein DETOXIFICATION 49                                               | -2.41 | -4.75 |
| At5g24080 | G-type lectin S-receptor-like serine/threonine-protein kinase At5g24080 | -2.40 | -3.93 |
| N/A       | Unknown protein                                                         | -2.37 | -3.19 |
| N/A       | Unknown protein                                                         | -2.36 | -3.35 |
| At2g30020 | Probable protein phosphatase 2C 25                                      | -2.34 | -3.98 |
| N/A       | Unknown protein                                                         | -2.31 | -2.90 |
| DAR4      | Protein DA1-related 4                                                   | -2.30 | -3.35 |
| PUB19     | U-box domain-containing protein 19                                      | -2.28 | -3.03 |
| N/A       | Unknown protein                                                         | -2.24 | -2.89 |
| LECRK3    | G-type lectin S-receptor-like serine/threonine-protein kinase LECRK3    | -2.22 | -3.50 |
| CRT3      | Calreticulin-3                                                          | -2.22 | -2.94 |

---
