# Supplementary material for: Salt Stress Tolerance in Casuarina glauca: Insights from the Branchlets Transcriptome
Source: MDPI journal article supplement (doi:10.3390/plants11212942), 2022-11-01
Supplement: s1 [file s1]

**Table S1.** Sequencing data from *Casuarina glauca* nodulated by nitrogen-fixing *Frankia casuarinae* Thr (NOD<sup>+</sup>) or non-nodulated plants supplied with KNO<sub>3</sub> (KNO<sub>3</sub><sup>+</sup>), grown in three different salinity conditions (200, 400, and 600 mM NaCl), plus the control (0 mM NaCl). Raw reads, obtained after sequencing, generated trimmed reads after submission to quality filters with Trimmomatic software.

| Plant-type                         | [NaCl]<br>mM | Strand  | Raw Reads       |     |                              | Trimmed Reads   |     |                              |
|------------------------------------|--------------|---------|-----------------|-----|------------------------------|-----------------|-----|------------------------------|
|                                    |              |         | Total Sequences | %GC | Min per base<br>seq. quality | Total Sequences | %GC | Min per base<br>seq. quality |
| NOD <sup>+</sup>                   | 0            | forward | 37010538        | 46  | 28                           | 26559076 (72%)  | 46  | 33                           |
|                                    |              | reverse | 37010538        | 46  | 15                           | 26559076 (72%)  | 46  | 31                           |
|                                    | 200          | forward | 33417448        | 45  | 28                           | 25496114 (76%)  | 45  | 33                           |
|                                    |              | reverse | 33417448        | 45  | 15                           | 25496114 (76%)  | 45  | 31                           |
|                                    | 400          | forward | 33716971        | 45  | 28                           | 22905738 (68%)  | 45  | 33                           |
|                                    |              | reverse | 33716971        | 45  | 15                           | 22905738 (68%)  | 45  | 31                           |
|                                    | 600          | forward | 33881260        | 46  | 27                           | 24012917 (71%)  | 45  | 33                           |
|                                    |              | reverse | 33881260        | 46  | 15                           | 24012917 (71%)  | 45  | 31                           |
| <u>KNO<sub>3</sub><sup>+</sup></u> | 0            | forward | 37089848        | 46  | 28                           | 27361402 (74%)  | 45  | 33                           |
|                                    |              | reverse | 37089848        | 46  | 2                            | 27361402 (74%)  | 46  | 31                           |
|                                    | 200          | forward | 38696059        | 46  | 28                           | 27277745 (71%)  | 45  | 33                           |
|                                    |              | reverse | 38696059        | 46  | 15                           | 27277745 (71%)  | 46  | 31                           |
|                                    | 400          | forward | 33546743        | 45  | 28                           | 24471108 (73%)  | 45  | 33                           |
|                                    |              | reverse | 33546743        | 45  | 15                           | 24471108 (73%)  | 45  | 31                           |
|                                    | 600          | forward | 35472156        | 46  | 28                           | 26000474 (73%)  | 45  | 33                           |
|                                    |              | reverse | 35472156        | 46  | 15                           | 26000474 (73%)  | 46  | 31                           |
