# Supplementary material for: Salt Stress Tolerance in Casuarina glauca: Insights from the Branchlets Transcriptome
Source: MDPI journal article supplement (doi:10.3390/plants11212942), 2022-11-01
Supplement: s1 [file s1]

**Table S4.** Quality assessment of a *de novo* transcriptome assembly, using gVolante website with BUSCO v2.0.1 option. The transcriptome was performed with Trinity software, using *Casuarina glauca* nodulated by nitrogen-fixing *Frankia casuarinae* Thr (NOD<sup>+</sup>) and non-nodulated plants supplied with KNO<sub>3</sub> (KNO<sub>3</sub><sup>+</sup>) reads, from samples grown at 0, 200, 400, and 600 mM NaCl.

| Completeness assessment                                 | Values                                     |
|---------------------------------------------------------|--------------------------------------------|
| Total number of core genes queried                      | 1440                                       |
| Number of core genes detected                           |                                            |
| <b>Complete</b>                                         | <b>1366 (94.86%)</b>                       |
| Complete + Partial                                      | 1412 (98.06%)                              |
| Number of missing core genes                            | 28 (1.94%)                                 |
| Average number of orthologs per core genes              | 1.92                                       |
| % of detected core genes that have more than 1 ortholog | 60.54                                      |
| Scores in BUSCO format                                  | C:94.8%[S:37.4%,D:57.4%],<br>F:3.2%,M:2.0% |
| Length statistics and composition                       | Values                                     |
| Number of sequences                                     | 181484                                     |
| Total length (nt)                                       | 289780263                                  |
| Longest sequence (nt)                                   | 17867                                      |
| Shortest sequence (nt)                                  | 183                                        |
| Mean sequence length (nt)                               | 1597                                       |
| Median sequence length (nt)                             | 1036                                       |
| N50 sequence length (nt)                                | 2792                                       |
| L50 sequence count                                      | 34704                                      |
| Number of sequences > 1K (nt)                           | 92205 (50.8%)                              |
| Number of sequences > 10K (nt)                          | 170 (0.1%)                                 |
| Number of sequences > 100K (nt)                         | 0                                          |
| Number of sequences > 1M (nt)                           | 0                                          |
| Number of sequences > 10M (nt)                          | 0                                          |
| Base composition (%)                                    | A: 30.98                                   |
| T: 27.94                                                |                                            |
| G: 19.24                                                |                                            |
| C: 21.85                                                |                                            |
| N: 0.00                                                 |                                            |
| Other: 0.00                                             |                                            |
| GC-content (%)                                          | 41.09                                      |
| Number of non-ACGTN (nt)                                | 0                                          |
