# Supplementary material for: Salt Stress Tolerance in Casuarina glauca: Insights from the Branchlets Transcriptome
Source: MDPI journal article supplement (doi:10.3390/plants11212942), 2022-11-01
Supplement: s1 [file s1]

**Table S7.** Full list of significantly differentially expressed genes (DEGs) by non-nodulated *Casuarina glauca* plants supplied with KNO<sub>3</sub> (KNO<sub>3</sub><sup>+</sup>), grown in 200, 400, and 600 mM NaCl. NCBI gene symbol, protein ID, Protein Name, E-value and Identities retrieved from NCBI blastx command line tool, using UniprotKB/Swissprot database, and Log2FC (positive values in bold). DEGs refers to each salinity-treatment in comparison with the control NaCl, respectively, 200: 200 vs. 0 mM NaCl, 400: 400 vs. 0 mM NaCl and 600: 600 vs. 0 mM NaCl), detected by DESeq, NOISeq and edgeR analysis with a False Discovery Rate < 0.05.

| Gene Symbol | Protein ID  | Protein Name                                                                | E-value | Identities | Log2FC |        |        |
|-------------|-------------|-----------------------------------------------------------------------------|---------|------------|--------|--------|--------|
|             |             |                                                                             |         |            | 200    | 400    | 600    |
| LRK10L-1.4  | LRL14_ARATH | LEAF RUST 10 DISEASE-RESISTANCE LOCUS RECEPTOR-LIKE PROTEIN KINASE-like 1.4 | 5E-07   | 45         | -      | -3.700 | -5.700 |
| SAUR20      | SAU20_ARATH | Auxin-responsive protein SAUR20                                             | 3E-23   | 65         | -      | -      | -3.459 |
| FLS2        | FLS2_ARATH  | LRR receptor-like serine/threonine-protein kinase FLS2                      | 2E-63   | 56         | -      | -3.609 | -      |
| LRK10       | LRK10_WHEAT | Rust resistance kinase Lr10                                                 | 8E-64   | 56         | -      | -      | -3.052 |
| WLIM1       | WLIM1_ARATH | LIM domain-containing protein WLIM1                                         | 1E-29   | 76         | -      | -2.682 | -3.874 |
| KIN12E      | KN12E_ARATH | Kinesin-like protein KIN-12E                                                | 1E-32   | 43         | -      | -      | -3.459 |
| CCR3        | ACCR3_ARATH | Putative serine/threonine-protein kinase-like protein CCR3                  | 0       | 56         | -      | -3.204 | -3.237 |
| DSC1        | DSC1_ARATH  | Disease resistance-like protein DSC1                                        | 3E-15   | 46         | -      | -      | -2.489 |
| CSLD3       | CSLD3_ARATH | Cellulose synthase-like protein D3                                          | 0       | 89         | -      | -2.694 | -      |
| PUB19       | PUB19_ARATH | U-box domain-containing protein 19                                          | 9E-10   | 43         | -      | -      | -2.284 |
| CRK27       | CRK27_ARATH | Cysteine-rich receptor-like protein kinase 27                               | 6E-17   | 49         | -      | -      | -4.907 |
| N/A         | PME_DAUCA   | Pectinesterase                                                              | 5E-33   | 88         | -      | -3.760 | -      |
| GALT6       | B3GTJ_ARATH | Hydroxyproline O-galactosyltransferase GALT6                                | 2E-07   | 70         | -      | -3.087 | -2.628 |
| ZED1        | ZED1_ARATH  | Non-functional pseudokinase ZED1                                            | 9E-04   | 47         | -      | -      | -2.615 |
| SAG101      | SG101_ARATH | Senescence-associated carboxylesterase 101                                  | 8E-27   | 51         | -      | -      | -3.659 |
| N           | TMVRN_NICGU | TMV resistance protein N                                                    | 3E-04   | 84         | -      | -      | -3.459 |

|           |             |                                                               |        |     |   |              |              |
|-----------|-------------|---------------------------------------------------------------|--------|-----|---|--------------|--------------|
| LECRK111  | LK111_ARATH | Putative L-type lectin-domain containing receptor kinase I.11 | 6E-124 | 51  | - | <b>2.369</b> | -            |
| TUBB3     | TBB3_ANEPH  | Tubulin beta-3 chain                                          | 2E-43  | 97  | - | -3.503       | -2.766       |
| AT7       | AT7_ORYSJ   | Acyl transferase 7                                            | 8E-52  | 41  | - | -            | -3.016       |
| ACA13     | ACA13_ARATH | Putative calcium-transporting ATPase 13, plasma membrane-type | 5E-43  | 78  | - | -6.476       | -5.476       |
| BGAL3     | BGAL3_ARATH | Beta-galactosidase 3                                          | 9E-38  | 56  | - | -3.202       | -            |
| RLP1      | RLP1_ARATH  | Receptor-like protein 1                                       | 1E-26  | 47  | - | -            | -2.907       |
| N/A       | LEC_ONOVI   | Lectin                                                        | 4E-08  | 57  | - | -4.600       | -6.600       |
| WRKY19    | WRK19_ARATH | Probable WRKY transcription factor 19                         | 3E-05  | 50  | - | -            | -3.170       |
| SAT       | SAT_CATRO   | Stemmadenine O-acetyltransferase                              | 2E-16  | 47  | - | -            | <b>3.392</b> |
| DTX56     | DTX56_ARATH | Protein DETOXIFICATION 56                                     | 1E-144 | 63  | - | -            | <b>3.392</b> |
| PK1       | KPRO_MAIZE  | Putative receptor protein kinase ZmPK1                        | 2E-80  | 59  | - | -            | -2.575       |
| CYP82A1   | C82A1_PEA   | Cytochrome P450 82A1                                          | 9E-40  | 62  | - | -            | -2.678       |
| N/A       | TBA_BLEJA   | Tubulin alpha chain                                           | 5E-06  | 100 | - | -2.871       | -2.519       |
| GAUT12    | GAUTC_ARATH | Probable galacturonosyltransferase 12                         | 0      | 77  | - | -3.662       | -4.790       |
| CCD8      | CCD8_ARATH  | Carotenoid cleavage dioxygenase 8, chloroplastic              | 4E-05  | 40  | - | -5.027       | -5.390       |
| DTX49     | DTX49_ARATH | Protein DETOXIFICATION 49                                     | 2E-24  | 69  | - | -            | -2.406       |
| DAR4      | DAR4_ARATH  | Protein DA1-related 4                                         | 3E-10  | 47  | - | -            | -2.298       |
| PLR_Fi1   | PILR1_FORIN | Bifunctional pinorexinol-lariciresinol reductase              | 2E-59  | 86  | - | -            | -2.716       |
| EDS1      | EDS1C_ARATH | Protein EDS1                                                  | 4E-14  | 56  | - | -4.392       | -4.392       |
| N/A       | CHIT2_TULSB | Chitinase 2                                                   | 5E-46  | 73  | - | -            | <b>2.807</b> |
| CNGC4     | CNGC4_ARATH | Cyclic nucleotide-gated ion channel 4                         | 4E-32  | 90  | - | -            | <b>2.672</b> |
| At3g56050 | Y3565_ARATH | Probable inactive receptor-like protein kinase At3g56050      | 1E-46  | 48  | - | -2.861       | -4.649       |
| SBT1.8    | SBT18_ARATH | Subtilisin-like protease SBT1.8                               | 6E-56  | 85  | - | -3.087       | -            |
| RPP13L4   | R13L4_ARATH | Disease resistance RPP13-like protein 4                       | 5E-35  | 60  | - | -            | -2.559       |
| PEX1      | PLRX1_ARATH | Pollen-specific leucine-rich repeat extensin-like protein 1   | 2E-45  | 61  | - | -4.087       | -            |
| N/A       | RLA0_LUPLU  | 60S acidic ribosomal protein P0                               | 2E-37  | 79  | - | -            | <b>2.627</b> |

|           |             |                                                                             |        |    |   |              |              |
|-----------|-------------|-----------------------------------------------------------------------------|--------|----|---|--------------|--------------|
| pod       | PER15_IPOBA | Peroxidase 15                                                               | 6E-65  | 64 | - | -            | -2.934       |
| PAL       | PALY_PINTA  | Phenylalanine ammonia-lyase                                                 | 4E-119 | 70 | - | -            | -3.700       |
| NDA1      | NDA1_ARATH  | Internal alternative NAD(P)H-ubiquinone oxidoreductase A1,<br>mitochondrial | 2E-20  | 80 | - | -3.688       | -4.858       |
| RBOHD     | RBOHD_ARATH | Respiratory burst oxidase homolog protein D                                 | 8E-39  | 87 | - | -2.784       | -            |
| MIK2      | MIK2_ARATH  | MDIS1-interacting receptor like kinase 2                                    | 1E-17  | 53 | - | -3.059       | -3.059       |
| PDI       | PDI_DATGL   | Protein disulfide-isomerase                                                 | 2E-06  | 68 | - | -            | -2.585       |
| At5g42100 | E1310_ARATH | Glucan endo-1,3-beta-glucosidase 10                                         | 2E-20  | 47 | - | -2.980       | -2.565       |
| At4g10390 | Y4103_ARATH | Probable receptor-like protein kinase At4g10390                             | 4E-39  | 61 | - | -3.585       | -            |
| LAC14     | LAC14_ARATH | Laccase-14                                                                  | 6E-38  | 50 | - | -3.571       | -3.152       |
| WAKL9     | WAKLH_ARATH | Wall-associated receptor kinase-like 9                                      | 1E-06  | 49 | - | -3.202       | -5.524       |
| FLA10     | FLA10_ARATH | Fasciclin-like arabinogalactan protein 10                                   | 2E-36  | 83 | - | -3.921       | -            |
| PGL3      | PGL3_ARATH  | Polygalacturonase 1 beta-like protein 3                                     | 3E-60  | 64 | - | -5.073       | -3.199       |
| DOT4      | PP320_ARATH | Pentatricopeptide repeat-containing protein DOT4, chloroplastic             | 0      | 63 | - | -3.509       | -5.624       |
| FER       | FERON_ARATH | Receptor-like protein kinase FERONIA                                        | 1E-31  | 47 | - | -            | -3.000       |
| CSLA9     | CSLA9_ARATH | Glucomannan 4-beta-mannosyltransferase 9                                    | 2E-31  | 78 | - | -4.248       | -3.248       |
| At3g10080 | GL32_ARATH  | Germin-like protein subfamily 3 member 2                                    | 7E-31  | 65 | - | -6.658       | -5.073       |
| At3g61750 | B561I_ARATH | Cytochrome b561 and DOMON domain-containing protein At3g61750               | 1E-50  | 60 | - | -3.605       | -6.775       |
| PLT6      | PLT6_ARATH  | Probable polyol transporter 6                                               | 4E-75  | 67 | - | -            | <b>4.555</b> |
| At5g24080 | Y5248_ARATH | G-type lectin S-receptor-like serine/threonine-protein kinase At5g24080     | 9E-27  | 57 | - | -            | -2.397       |
| AOS1      | AOS1_SOLLC  | Allene oxide synthase 1, chloroplastic                                      | 3E-113 | 67 | - | -2.753       | -3.519       |
| TOGT1     | SCGT_TOBAC  | Scopoletin glucosyltransferase                                              | 2E-34  | 66 | - | <b>2.290</b> | <b>2.713</b> |
| PME3      | PME3_ARATH  | Pectinesterase/pectinesterase inhibitor 3                                   | 9E-56  | 78 | - | -3.539       | -            |
| N/A       | 21KD_DAUCA  | 21 kDa protein                                                              | 5E-47  | 51 | - | -4.115       | -3.700       |
| PBL9      | PBL9_ARATH  | Probable serine/threonine-protein kinase PBL9                               | 9E-08  | 81 | - | -3.700       | -3.870       |
| At2g27310 | FB119_ARATH | F-box protein At2g27310                                                     | 4E-56  | 54 | - | -3.799       | -3.642       |

|              |             |                                                                                   |        |    |   |              |              |
|--------------|-------------|-----------------------------------------------------------------------------------|--------|----|---|--------------|--------------|
| FLA17        | FLA17_ARATH | Fasciclin-like arabinogalactan protein 17                                         | 1E-175 | 76 | - | -            | -3.043       |
| At5g66900    | DRL42_ARATH | Probable disease resistance protein At5g66900                                     | 2E-11  | 50 | - | -2.459       | -            |
| PME6         | PME6_ARATH  | Probable pectinesterase/pectinesterase inhibitor 6                                | 3E-146 | 68 | - | -4.220       | -4.341       |
| At4g32285    | CAP1_ARATH  | Probable clathrin assembly protein At4g32285                                      | 2E-25  | 58 | - | -2.652       | -            |
| CESA9        | CESA9_ORYSI | Cellulose synthase A catalytic subunit 9 [UDP-forming]                            | 7E-56  | 72 | - | -3.524       | -6.109       |
| MAKR6        | MAKR6_ARATH | Probable membrane-associated kinase regulator 6                                   | 2E-07  | 78 | - | -            | <b>4.366</b> |
| TAO1         | TAO1_ARATH  | Disease resistance protein TAO1                                                   | 6E-10  | 41 | - | -2.722       | -4.044       |
| AMT1-1       | AMT11_ARATH | Ammonium transporter 1 member 1                                                   | 0      | 82 | - | -            | -2.417       |
| SOBIR1       | SBIR1_ARATH | Leucine-rich repeat receptor-like serine/threonine/tyrosine-protein kinase SOBIR1 | 7E-124 | 80 | - | -2.614       | -3.373       |
| RCOM_0699480 | Y232_RICCO  | Glycosyltransferase family 92 protein RCOM_0530710                                | 3E-102 | 49 | - | -2.701       | -2.785       |
| HSP70        | HSP70_SOYBN | Heat shock 70 kDa protein                                                         | 3E-70  | 84 | - | <b>3.363</b> | <b>3.123</b> |
| GH3.2        | GH32_ARATH  | Indole-3-acetic acid-amido synthetase GH3.2                                       | 2E-118 | 74 | - | -4.644       | -4.354       |
| PATL4        | PATL4_ARATH | Patellin-4                                                                        | 1E-08  | 78 | - | -5.129       | -            |
| OFUT10       | OFT10_ARATH | O-fucosyltransferase 10                                                           | 3E-05  | 64 | - | -            | -3.700       |
| GALS1        | GALS1_ARATH | Galactan beta-1,4-galactosyltransferase GALS1                                     | 8E-30  | 75 | - | -3.115       | -            |
| At1g33260    | Y1332_ARATH | Probable receptor-like protein kinase At1g33260                                   | 2E-06  | 57 | - | -4.170       | -4.170       |
| LRX4         | LRX4_ARATH  | Leucine-rich repeat extensin-like protein 4                                       | 2E-155 | 79 | - | -3.781       | -            |
| WRKY70       | WRK70_ARATH | Probable WRKY transcription factor 70                                             | 1E-29  | 66 | - | -2.539       | -3.116       |
| PNC1         | PER1_ARAHY  | Cationic peroxidase 1                                                             | 7E-39  | 77 | - | -            | <b>2.330</b> |
| N/A          | BCP_PEA     | Blue copper protein                                                               | 3E-33  | 79 | - | -            | -2.874       |
| TUBB1        | TBB1_MAIZE  | Tubulin beta-1 chain                                                              | 9E-39  | 95 | - | -3.059       | -            |
| CYP81E8      | C81E8_MEDTR | Cytochrome P450 81E8                                                              | 1E-04  | 83 | - | -4.346       | -3.346       |
| At4g22030    | FB333_ARATH | Probable F-box protein At4g22030                                                  | 6E-14  | 64 | - | -            | -4.248       |
| P85          | SDEH4_ARATH | Senescence/dehydration-associated protein At4g35985, chloroplastic                | 6E-14  | 57 | - | -2.415       | -            |
| N/A          | PME_PRUPE   | Pectinesterase/pectinesterase inhibitor PPE8B                                     | 3E-11  | 66 | - | -4.392       | -            |

|           |             |                                                                      |        |    |        |              |              |
|-----------|-------------|----------------------------------------------------------------------|--------|----|--------|--------------|--------------|
| PGDH2     | SERA2_ARATH | D-3-phosphoglycerate dehydrogenase 2, chloroplastic                  | 3E-41  | 86 | -      | -3.558       | -3.406       |
| FLA12     | FLA12_ARATH | Fasciclin-like arabinogalactan protein 12                            | 5E-14  | 72 | -      | -5.055       | -5.640       |
| CESA7     | CESA7_ARATH | Cellulose synthase A catalytic subunit 7 [UDP-forming]               | 5E-75  | 87 | -      | -4.420       | -4.420       |
| EXO70H1   | E70H1_ARATH | Exocyst complex component EXO70H1                                    | 1E-24  | 54 | -      | -            | -3.102       |
| XCP1      | XCP1_ARATH  | Cysteine protease XCP1                                               | 1E-22  | 64 | -      | -6.883       | -6.883       |
| PUMP5     | PUMP5_ARATH | Mitochondrial uncoupling protein 5                                   | 2E-24  | 77 | -      | -2.707       | -2.964       |
| ERF020    | ERF20_ARATH | Ethylene-responsive transcription factor ERF020                      | 2E-21  | 79 | -4.059 | -5.644       | -3.644       |
| At3g27390 | Y3739_ARATH | Uncharacterized membrane protein At3g27390                           | 4E-74  | 71 | -      | -            | <b>4.881</b> |
| NHL10     | NHL10_ARATH | NDR1/HIN1-like protein 10                                            | 5E-17  | 48 | -      | -            | -2.377       |
| UGT709C2  | UGT8_CATRO  | 7-deoxyloganetic acid glucosyltransferase                            | 4E-50  | 72 | -      | -            | <b>3.415</b> |
| LYK4      | LYK4_ARATH  | LysM domain receptor-like kinase 4                                   | 5E-12  | 45 | -      | -            | -4.170       |
| ROMT      | ROMT_VITVI  | Trans-resveratrol di-O-methyltransferase                             | 1E-59  | 50 | -      | -4.787       | -5.166       |
| ACA12     | ACA12_ARATH | Calcium-transporting ATPase 12, plasma membrane-type                 | 5E-69  | 67 | -      | -3.087       | -4.087       |
| CRT3      | CALR3_ARATH | Calreticulin-3                                                       | 2E-29  | 79 | -      | -            | -2.220       |
| CYP707A7  | ABAH3_ORYSI | Abscisic acid 8'-hydroxylase 3                                       | 1E-13  | 69 | -      | -            | <b>2.303</b> |
| LRX6      | LRX6_ARATH  | Leucine-rich repeat extensin-like protein 6                          | 1E-160 | 68 | -      | -3.185       | -4.408       |
| SDI1      | SDI1_ARATH  | Protein SULFUR DEFICIENCY-INDUCED 1                                  | 3E-08  | 56 | -      | <b>3.000</b> | -            |
| LECRK3    | LERK3_ORYSI | G-type lectin S-receptor-like serine/threonine-protein kinase LECRK3 | 4E-72  | 56 | -      | -            | -2.225       |
| GH3.1     | GH31_ARATH  | Probable indole-3-acetic acid-amido synthetase GH3.1                 | 3E-62  | 83 | -      | -4.883       | -4.298       |
| ASPG2     | ASPG2_ARATH | Protein ASPARTIC PROTEASE IN GUARD CELL 2                            | 3E-53  | 63 | -      | -3.369       | -3.954       |
| At4g37220 | CRPM4_ARATH | Cold-regulated 413 plasma membrane protein 4                         | 8E-07  | 42 | -      | -3.719       | -            |
| At2g40270 | Y2027_ARATH | Inactive receptor-like serine/threonine-protein kinase At2g40270     | 8E-06  | 62 | -      | -3.306       | -5.476       |
| PER64     | PER64_ARATH | Peroxidase 64                                                        | 5E-59  | 60 | -      | -4.891       | -4.476       |
| PUB33     | PUB33_ARATH | U-box domain-containing protein 33                                   | 5E-13  | 60 | -      | -            | <b>2.436</b> |
| UGT76D1   | U76D1_ARATH | UDP-glycosyltransferase 76D1                                         | 1E-05  | 63 | -      | -2.526       | -3.848       |
| COBL4     | COBL4_ARATH | COBRA-like protein 4                                                 | 3E-21  | 87 | -      | -            | -3.700       |

|            |             |                                                                                |        |    |   |        |              |
|------------|-------------|--------------------------------------------------------------------------------|--------|----|---|--------|--------------|
| At5g39865  | Y5986_ARATH | Uncharacterized protein At5g39865                                              | 9E-08  | 71 | - | -2.821 | -2.336       |
| EDS1       | EDS1L_ARATH | Protein EDS1L                                                                  | 2E-37  | 45 | - | -      | -2.704       |
| CXE17      | CXE17_ARATH | Probable carboxylesterase 17                                                   | 4E-19  | 49 | - | -      | -3.700       |
| GLR2.9     | GLR29_ARATH | Glutamate receptor 2.9                                                         | 2E-06  | 43 | - | -      | -2.858       |
| UGT76E2    | U76E2_ARATH | UDP-glycosyltransferase 76E2                                                   | 8E-56  | 70 | - | -2.844 | -3.048       |
| YAH3       | H32_LILLO   | Histone H3.2                                                                   | 9E-42  | 99 | - | -5.476 | -3.668       |
| At2g17340  | D89S2_ARATH | Damage-control phosphatase At2g17340                                           | 2E-160 | 86 | - | -      | -4.536       |
| CYP74A     | CP74A_ARATH | Allene oxide synthase, chloroplastic                                           | 2E-40  | 78 | - | -2.421 | -3.134       |
| LRK10L-1.5 | LRL15_ARATH | LEAF RUST 10 DISEASE-RESISTANCE LOCUS RECEPTOR-LIKE<br>PROTEIN KINASE-like 1.5 | 0      | 63 | - | -3.568 | -            |
| DTX27      | DTX27_ARATH | Protein DETOXIFICATION 27                                                      | 3E-24  | 60 | - | -      | <b>2.690</b> |
| At4g03230  | Y4230_ARATH | G-type lectin S-receptor-like serine/threonine-protein kinase At4g03230        | 1E-46  | 70 | - | -      | -2.615       |
| AT9        | AT9_ORYSJ   | Acyl transferase 9                                                             | 2E-17  | 44 | - | -      | -3.858       |
| STN8       | STN8_ARATH  | Serine/threonine-protein kinase STN8, chloroplastic                            | 0      | 69 | - | -4.212 | -5.119       |
| TAF6       | TAF6_ARATH  | Transcription initiation factor TFIID subunit 6                                | 2E-121 | 79 | - | -4.827 | -5.505       |
| CCR4       | ACCR4_ARATH | Serine/threonine-protein kinase-like protein CCR4                              | 3E-83  | 40 | - | -2.797 | -3.803       |
| SAP12      | SAP12_ARATH | Zinc finger AN1 domain-containing stress-associated protein 12                 | 2E-26  | 58 | - | -3.793 | -2.600       |
| Bp10       | ASOL_BRANA  | L-ascorbate oxidase homolog                                                    | 5E-31  | 57 | - | -4.170 | -            |
| RLP15      | RLP15_ARATH | Receptor-like protein 15                                                       | 3E-19  | 44 | - | -3.020 | -            |
| LAC9       | LAC9_ORYSJ  | Putative laccase-9                                                             | 1E-34  | 71 | - | -4.346 | -4.931       |
| SCPL4      | SCP4_ARATH  | Serine carboxypeptidase-like 4                                                 | 3E-15  | 53 | - | -      | -3.807       |
| NAC090     | NAC90_ARATH | NAC domain-containing protein 90                                               | 2E-43  | 67 | - | -      | -3.141       |
| RE1        | POLR1_ARATH | Retrovirus-related Pol polyprotein from transposon RE1                         | 3E-72  | 42 | - | -2.588 | -3.588       |
| RDR1       | RDR1_ARATH  | RNA-dependent RNA polymerase 1                                                 | 8E-32  | 60 | - | -2.585 | -2.826       |
| NSP5       | NSP5_ARATH  | Nitrile-specifier protein 5                                                    | 3E-27  | 59 | - | -      | <b>2.487</b> |
| N/A        | PRU1_PRUAR  | Major allergen Pru ar 1                                                        | 9E-39  | 45 | - | -4.033 | -5.448       |

|           |             |                                                               |        |    |        |              |        |
|-----------|-------------|---------------------------------------------------------------|--------|----|--------|--------------|--------|
| CRRSP38   | CRR38_ARATH | Cysteine-rich repeat secretory protein 38                     | 2E-08  | 44 | -      | -2.939       | -3.939 |
| LRX2      | LRX2_ARATH  | Leucine-rich repeat extensin-like protein 2                   | 0      | 75 | -      | -5.157       | -      |
| ERF112    | EF112_ARATH | Ethylene-responsive transcription factor ERF112               | 2E-17  | 83 | -      | -3.462       | -3.898 |
| BHLH92    | BH092_ARATH | Transcription factor bHLH92                                   | 1E-14  | 54 | -      | -            | -3.322 |
| PER53     | PER53_ARATH | Peroxidase 53                                                 | 1E-18  | 46 | -      | -3.036       | -      |
| N/A       | POLX_TOBAC  | Retrovirus-related Pol polyprotein from transposon TNT 1-94   | 1E-36  | 49 | -      | -            | -4.524 |
| SOT15     | SOT15_ARATH | Cytosolic sulfotransferase 15                                 | 5E-141 | 61 | -      | -3.210       | -3.364 |
| XXT3      | XXT3_ARATH  | Probable xyloglucan 6-xylosyltransferase 3                    | 2E-61  | 86 | -      | -3.063       | -      |
| N/A       | PME1_FICPW  | Pectinesterase/pectinesterase inhibitor                       | 6E-15  | 51 | -      | -2.921       | -      |
| RGA5      | RGA5R_ORYSJ | Disease resistance protein RGA5                               | 3E-04  | 44 | -      | -            | -3.160 |
| RFS6      | RFS6_ARATH  | Probable galactinol--sucrose galactosyltransferase 6          | 6E-33  | 73 | -      | -3.000       | -2.415 |
| CML41     | CML41_ARATH | Probable calcium-binding protein CML41                        | 1E-49  | 50 | -      | -2.814       | -3.213 |
| DREB1D    | DRE1D_ARATH | Dehydration-responsive element-binding protein 1D             | 2E-32  | 71 | -      | -4.044       | -3.307 |
| At2g30020 | P2C25_ARATH | Probable protein phosphatase 2C 25                            | 8E-32  | 74 | -      | -            | -2.344 |
| CSLD2     | CSLD2_ARATH | Cellulose synthase-like protein D2                            | 3E-31  | 73 | -      | -3.585       | -      |
| At5g22810 | GDL78_ARATH | GDSL esterase/lipase At5g22810                                | 2E-27  | 73 | -      | -3.248       | -      |
| ARF16     | ARFP_ARATH  | Auxin response factor 16                                      | 2E-30  | 72 | -      | <b>2.644</b> | -      |
| GT-3B     | TGT3B_ARATH | Trihelix transcription factor GT-3b                           | 1E-04  | 55 | -3.807 | -3.807       | -      |
| WAXY      | SSG1_MANES  | Granule-bound starch synthase 1, chloroplastic/amyloplastic   | 6E-04  | 76 | -      | <b>3.459</b> | -      |
| At1g18250 | TLPH_ARATH  | Thaumatococcus-like protein                                   | 6E-66  | 73 | -      | -3.759       | -2.372 |
| MUR1      | GMD2_ARATH  | GDP-mannose 4,6 dehydratase 2                                 | 7E-15  | 68 | -      | -            | -2.541 |
| HMA1      | HMA1_ARATH  | Probable cadmium/zinc-transporting ATPase HMA1, chloroplastic | 1E-69  | 72 | -      | -4.585       | -      |
| At1g32860 | E1311_ARATH | Glucan endo-1,3-beta-glucosidase 11                           | 3E-47  | 45 | -      | -3.202       | -      |
| N/A       | MYRS_QUEIL  | Myrcene synthase, chloroplastic                               | 4E-22  | 65 | -      | <b>3.129</b> | -      |
| PRB1      | PRB1_ARATH  | Pathogenesis-related protein 1                                | 6E-66  | 62 | -      | -            | -5.600 |
| PUB17     | PUB17_ARATH | U-box domain-containing protein 17                            | 7E-35  | 70 | -      | -2.758       | -2.758 |

|           |             |                                                           |        |    |   |              |              |
|-----------|-------------|-----------------------------------------------------------|--------|----|---|--------------|--------------|
| RPP1      | RPP1_ARATH  | Probable disease resistance protein RPP1                  | 1E-04  | 56 | - | -            | -4.322       |
| RL5       | RADL5_ARATH | Protein RADIALIS-like 5                                   | 2E-28  | 70 | - | -5.931       | -5.931       |
| CHS2      | CHS2_CAMSI  | Chalcone synthase 2                                       | 7E-47  | 96 | - | -            | -2.305       |
| GNS1      | E13B_PRUPE  | Glucan endo-1,3-beta-glucosidase, basic isoform           | 1E-157 | 68 | - | -            | -2.501       |
| RAP2-3    | RAP23_ARATH | Ethylene-responsive transcription factor RAP2-3           | 4E-19  | 62 | - | -            | <b>2.353</b> |
| N/A       | C7A12_PANGI | Cytochrome P450 CYP736A12                                 | 1E-70  | 63 | - | -            | -2.665       |
| RGA1      | RGA1_SOLBU  | Putative disease resistance protein RGA1                  | 2E-04  | 41 | - | -            | -3.209       |
| CXE6      | CXE6_ARATH  | Probable carboxylesterase 6                               | 8E-14  | 40 | - | -            | -3.143       |
| UGT87A1   | U87A1_ARATH | UDP-glycosyltransferase 87A1                              | 9E-85  | 46 | - | <b>2.824</b> | -            |
| RL3       | RADL3_ARATH | Protein RADIALIS-like 3                                   | 1E-28  | 75 | - | -2.623       | -3.490       |
| rpoC1     | RPOC1_CHLSC | DNA-directed RNA polymerase subunit beta'                 | 5E-25  | 81 | - | -            | <b>2.468</b> |
| N/A       | BABL_CUCSA  | Basic blue protein                                        | 3E-25  | 65 | - | -            | -2.950       |
| GATL2     | GATL2_ARATH | Probable galacturonosyltransferase-like 2                 | 2E-22  | 56 | - | -4.087       | -            |
| TIR       | TIR_ARATH   | Toll/interleukin-1 receptor-like protein                  | 3E-32  | 51 | - | -2.893       | -2.700       |
| At1g12500 | PT112_ARATH | Probable sugar phosphate/phosphate translocator At1g12500 | 1E-78  | 87 | - | -            | -3.492       |
| GAE6      | GAE6_ARATH  | UDP-glucuronate 4-epimerase 6                             | 6E-97  | 93 | - | -2.647       | -            |
| BXL7      | BXL7_ARATH  | Probable beta-D-xylosidase 7                              | 9E-108 | 71 | - | -3.794       | -            |
| KIN14Q    | KN14Q_ARATH | Kinesin-like protein KIN-14Q                              | 3E-18  | 56 | - | -4.030       | -4.030       |
| CYCD1-1   | CCD11_ARATH | Cyclin-D1-1                                               | 6E-17  | 61 | - | -            | -2.536       |
| PLP2      | PLP2_ARATH  | Patatin-like protein 2                                    | 1E-44  | 66 | - | -            | -3.939       |
| LAC22     | LAC22_ORYSJ | Laccase-22                                                | 4E-138 | 64 | - | -4.344       | -6.459       |
| ROPGAP2   | RGAP2_ARATH | Rho GTPase-activating protein 2                           | 1E-20  | 65 | - | -4.644       | -            |
| At1g73050 | MDLL_ARATH  | (R)-mandelonitrile lyase-like                             | 2E-24  | 58 | - | -            | -2.300       |
| TBL30     | TBL30_ARATH | Protein trichome birefringence-like 30                    | 1E-05  | 86 | - | -            | -3.059       |
| AATP1     | ASD_ARATH   | AAA-ATPase ASD, mitochondrial                             | 3E-15  | 50 | - | -            | -3.629       |
| LECRK91   | LRK91_ARATH | L-type lectin-domain containing receptor kinase IX.1      | 4E-33  | 68 | - | -3.196       | -5.781       |



|           |             |                                                 |        |    |   |        |        |
|-----------|-------------|-------------------------------------------------|--------|----|---|--------|--------|
| GT17      | GT17_ARATH  | Probable xyloglucan galactosyltransferase GT17  | 7E-15  | 57 | - | -3.617 | -      |
| IRX15-L   | IX15L_ARATH | Protein IRX15-LIKE                              | 3E-25  | 61 | - | -3.026 | -5.418 |
| APG       | APG2_ARATH  | GDSL esterase/lipase APG                        | 8E-19  | 65 | - | -      | -3.907 |
| At5g20050 | Y5005_ARATH | Probable receptor-like protein kinase At5g20050 | 3E-145 | 64 | - | -      | -2.554 |
| FLZ17     | FLZ17_ARATH | FCS-Like Zinc finger 17                         | 7E-06  | 60 | - | -      | -2.648 |
| CML37     | CML37_ARATH | Calcium-binding protein CML37                   | 1E-19  | 50 | - | -      | -2.948 |
| SERK4     | SERK4_ARATH | Somatic embryogenesis receptor kinase 4         | 1E-05  | 40 | - | -4.369 | -5.954 |
| PLP1      | PLP1_ARATH  | Patatin-like protein 1                          | 3E-26  | 88 | - | -      | -3.607 |
| TAR1      | TAR1_YEAST  | Protein TAR1                                    | 2E-06  | 78 | - | -4.248 | -      |
| N/A       | LECS_VATMA  | Seed lectin                                     | 2E-16  | 40 | - | -3.807 | -6.392 |
| UGT85A23  | UGT6_CATRO  | 7-deoxyloganetin glucosyltransferase            | 2E-142 | 55 | - | -      | -2.542 |
| ABCB13    | AB13B_ARATH | ABC transporter B family member 13              | 3E-59  | 75 | - | -3.907 | -      |
| PHT1-12   | PT112_ORYSJ | Probable inorganic phosphate transporter 1-12   | 2E-32  | 79 | - | -2.596 | -3.043 |

---
