# Supplementary material for: Salt Stress Tolerance in Casuarina glauca: Insights from the Branchlets Transcriptome
Source: MDPI journal article supplement (doi:10.3390/plants11212942), 2022-11-01
Supplement: s1 [file s1]

**Table S3.** Alignment statistics of *Casuarina glauca* nodulated by nitrogen-fixing *Frankia casuarinae* Thr (NOD<sup>+</sup>) and non-nodulated plants supplied with KNO<sub>3</sub> (KNO<sub>3</sub><sup>+</sup>) reads, from samples grown at 0, 200, 400, and 600 mM NaCl, against a *de novo* transcriptome assembly, performed with Trinity software using these same reads.

| Statistics                                                   | Counts           | Percentages   |
|--------------------------------------------------------------|------------------|---------------|
| Total reads                                                  | 204084574        | -             |
| Paired-end reads                                             | 204084574        | 100%          |
| Uniquely aligned reads                                       | 30963937         | 15.2%         |
| Reads aligned multiple times                                 | 165311208        | 81%           |
| <b>Total aligned reads</b>                                   | <b>196275145</b> | <b>96.2%</b>  |
| Concordantly or discordantly unaligned reads                 | 7374204          | 3.6%          |
| <b>Concordantly unaligned and discordantly aligned reads</b> | <b>435225</b>    | <b>0.2%</b>   |
| Total concordantly unaligned reads                           | 7809429          | 3.8%          |
| Mates make up the pairs                                      | 14748408         | -             |
| Unaligned mates                                              | 3360270          | 22.8%*        |
| Uniquely aligned mates                                       | 1263913          | 8.6%*         |
| Mates aligned multiple times                                 | 10124225         | 68.7%*        |
| <b>Total aligned mates</b>                                   | <b>11388138</b>  | <b>2.8%**</b> |
| <b>Overall alignment rate</b>                                |                  | <b>99.2%</b>  |
