# Supplementary material for: Salt Stress Tolerance in Casuarina glauca: Insights from the Branchlets Transcriptome
Source: MDPI journal article supplement (doi:10.3390/plants11212942), 2022-11-01
Supplement: s1 [file s1]

**Table S8.** Full list of significantly differentially expressed genes (DEGs) in branchlets of *Casuarina glauca* nodulated by nitrogen-fixing *Frankia casuarinae* Thr (NOD<sup>+</sup>), grown in 200, 400, and 600 mM NaCl. NCBI gene symbol, protein ID, Protein Name, E-value and Identities retrieved from NBCI blastx command line tool, using UniprotKB/Swissprot database and Log2FC (positive values in bold). DEGs refers to each salinity treatment in comparison with the control NaCl, respectively, 200: 200 vs. 0 mM NaCl, 400: 400 vs 0 mM NaCl, and 600: 600 vs. 0 mM NaCl), detected by DESeq, NOISeq and edgeR analysis with a False Discovery Rate < 0.05.

| Gene Symbol | Protein ID  | Protein Name                                                                | E-value | Identities | Log <sub>2</sub> FC |              |              |
|-------------|-------------|-----------------------------------------------------------------------------|---------|------------|---------------------|--------------|--------------|
|             |             |                                                                             |         |            | 200                 | 400          | 600          |
| LRK10L-1.4  | LRL14_ARATH | LEAF RUST 10 DISEASE-RESISTANCE LOCUS RECEPTOR-LIKE PROTEIN KINASE-like 1.4 | 5E-07   | 45         | -                   | -3.184       | -5.059       |
| FLS2        | FLS2_ARATH  | LRR receptor-like serine/threonine-protein kinase FLS2                      | 2E-63   | 56         | -                   | -3.628       | -4.280       |
| LRK10       | LRK10_WHEAT | Rust resistance kinase Lr10                                                 | 8E-64   | 56         | -                   | -            | -3.262       |
| PUB19       | PUB19_ARATH | U-box domain-containing protein 19                                          | 9E-10   | 43         | -                   | -            | -3.031       |
| At3g18200   | WTR17_ARATH | WAT1-related protein At3g18200                                              | 1E-07   | 63         | -                   | -            | <b>2.907</b> |
| SAG101      | SG101_ARATH | Senescence-associated carboxylesterase 101                                  | 8E-27   | 51         | -                   | -            | -3.879       |
| UGT85A23    | UGT6_CATRO  | 7-deoxyloganetin glucosyltransferase                                        | 7E-17   | 68         | -                   | -2.807       | -3.544       |
| N           | TMVRN_NICGU | TMV resistance protein N                                                    | 2E-36   | 61         | -                   | -            | -2.898       |
| At1g06840   | Y1684_ARATH | Probable LRR receptor-like serine/threonine-protein kinase At1g06840        | 2E-32   | 68         | -                   | -            | -2.756       |
| TIC214      | TI214_HELAN | Protein TIC 214                                                             | 2E-23   | 66         | -                   | -            | <b>2.907</b> |
| ZED1        | ZED1_ARATH  | Non-functional pseudokinase ZED1                                            | 2E-24   | 47         | -                   | -            | -3.222       |
| N/A         | LEC_ONOVI   | Lectin                                                                      | 4E-08   | 57         | -                   | -3.644       | -5.644       |
| RABA3       | RABA3_ARATH | Ras-related protein RABA3                                                   | 7E-50   | 85         | -                   | -            | -3.087       |
| At3g28600   | AATPA_ARATH | AAA-ATPase At3g28600                                                        | 4E-48   | 73         | -                   | -            | -2.867       |
| SAT         | SAT_CATRO   | Stemmadenine O-acetyltransferase                                            | 2E-16   | 47         | -                   | <b>2.585</b> | <b>2.700</b> |
| DTX56       | DTX56_ARATH | Protein DETOXIFICATION 56                                                   | 1E-144  | 63         | -                   | -            | <b>2.929</b> |

|           |             |                                                                            |        |    |   |              |        |
|-----------|-------------|----------------------------------------------------------------------------|--------|----|---|--------------|--------|
| PK1       | KPRO_MAIZE  | Putative receptor protein kinase ZmPK1                                     | 2E-80  | 59 | - | -            | -3.593 |
| CCD8      | CCD8_ARATH  | Carotenoid cleavage dioxygenase 8, chloroplastic                           | 4E-05  | 40 | - | -7.250       | -6.134 |
| DTX49     | DTX49_ARATH | Protein DETOXIFICATION 49                                                  | 2E-24  | 69 | - | -            | -4.755 |
| SERK2     | SERK2_ORYSJ | LRR receptor kinase SERK2                                                  | 1E-03  | 47 | - | -            | -2.872 |
| DAR4      | DAR4_ARATH  | Protein DA1-related 4                                                      | 3E-10  | 47 | - | -            | -3.350 |
| AHL17     | AHL17_ARATH | AT-hook motif nuclear-localized protein 17                                 | 4E-10  | 65 | - | -            | -2.700 |
| N/A       | CHIT2_TULSB | Chitinase 2                                                                | 5E-46  | 73 | - | <b>2.267</b> | -      |
| ATL55     | ATL55_ARATH | E3 ubiquitin-protein ligase RING1                                          | 3E-27  | 83 | - | -            | -3.228 |
| RPP13L4   | R13L4_ARATH | Disease resistance RPP13-like protein 4                                    | 5E-35  | 60 | - | -            | -3.311 |
| UGT85K4   | UGTK4_MANES | Linamarin synthase 1                                                       | 1E-130 | 60 | - | -            | -2.903 |
| pod       | PER15_IPOBA | Peroxidase 15                                                              | 6E-65  | 64 | - | -3.682       | -5.530 |
| N/A       | TLP1_PRUPE  | Thaumatococcus-like protein 1                                              | 2E-39  | 64 | - | <b>3.110</b> | -      |
| RBOHD     | RBOHD_ARATH | Respiratory burst oxidase homolog protein D                                | 7E-26  | 84 | - | -            | -2.555 |
| At1g06800 | PLA15_ARATH | Phospholipase A1-Igammal, chloroplastic                                    | 9E-21  | 41 | - | -            | -4.392 |
| WAKL9     | WAKLH_ARATH | Wall-associated receptor kinase-like 9                                     | 1E-06  | 49 | - | -            | -5.044 |
| At4g16563 | ASP63_ARATH | Probable aspartyl protease At4g16563                                       | 5E-146 | 62 | - | -            | -3.370 |
| RE1       | POLR1_ARATH | Retrovirus-related Pol polypeptide from transposon RE1                     | 3E-14  | 43 | - | -            | -3.000 |
| At5g24080 | Y5248_ARATH | G-type lectin S-receptor-like serine/threonine-protein kinase<br>At5g24080 | 9E-27  | 57 | - | -            | -3.931 |
| AOS1      | AOS1_SOLLC  | Allene oxide synthase 1, chloroplastic                                     | 3E-113 | 67 | - | -            | -3.774 |
| PBL9      | PBL9_ARATH  | Probable serine/threonine-protein kinase PBL9                              | 9E-08  | 81 | - | -2.766       | -3.350 |
| At2g27310 | FB119_ARATH | F-box protein At2g27310                                                    | 4E-56  | 54 | - | -            | -3.829 |
| CHS       | CHSY_BETPN  | Chalcone synthase                                                          | 2E-178 | 75 | - | -            | -2.825 |
| PME6      | PME6_ARATH  | Probable pectinesterase/pectinesterase inhibitor 6                         | 3E-146 | 68 | - | -5.275       | -4.660 |
| PLP1      | PLP1_ARATH  | Patatin-like protein 1                                                     | 6E-31  | 92 | - | -            | -3.026 |
| LBD1      | LBD1_ARATH  | LOB domain-containing protein 1                                            | 1E-28  | 92 | - | -            | -3.534 |

|           |             |                                                                                   |        |    |   |              |              |
|-----------|-------------|-----------------------------------------------------------------------------------|--------|----|---|--------------|--------------|
| MAKR6     | MAKR6_ARATH | Probable membrane-associated kinase regulator 6                                   | 2E-07  | 78 | - | -            | <b>2.861</b> |
| TAO1      | TAO1_ARATH  | Disease resistance protein TAO1                                                   | 6E-10  | 41 | - | -            | -5.728       |
| UGT73E1   | U73E1_STERE | UDP-glycosyltransferase 73E1                                                      | 1E-55  | 53 | - | <b>3.524</b> | -            |
| SOBIR1    | SBIR1_ARATH | Leucine-rich repeat receptor-like serine/threonine/tyrosine-protein kinase SOBIR1 | 7E-124 | 80 | - | -            | -4.445       |
| HSP70     | HSP70_SOYBN | Heat shock 70 kDa protein                                                         | 3E-70  | 84 | - | <b>3.301</b> | <b>2.729</b> |
| GH3.2     | GH32_ARATH  | Indole-3-acetic acid-amido synthetase GH3.2                                       | 2E-118 | 74 | - | -3.412       | -3.049       |
| SBT1.8    | SBT18_ARATH | Subtilisin-like protease SBT1.8                                                   | 5E-23  | 49 | - | -3.430       | -            |
| WRKY70    | WRK70_ARATH | Probable WRKY transcription factor 70                                             | 1E-29  | 66 | - | -            | -3.263       |
| FLA12     | FLA12_ARATH | Fasciclin-like arabinogalactan protein 12                                         | 5E-14  | 72 | - | -4.542       | -3.864       |
| EXO70H1   | E70H1_ARATH | Exocyst complex component EXO70H1                                                 | 1E-24  | 54 | - | -            | -3.807       |
| PUMP5     | PUMP5_ARATH | Mitochondrial uncoupling protein 5                                                | 2E-24  | 77 | - | -            | -3.000       |
| At5g10770 | ASPA_ARATH  | Aspartyl protease family protein At5g10770                                        | 1E-33  | 59 | - | -            | -4.170       |
| HSP22.7   | HSP41_PEA   | 22.7 kDa class IV heat shock protein                                              | 1E-46  | 52 | - | -            | <b>2.357</b> |
| ROMT      | ROMT_VITVI  | Trans-resveratrol di-O-methyltransferase                                          | 1E-59  | 50 | - | -3.730       | -4.829       |
| CRT3      | CALR3_ARATH | Calreticulin-3                                                                    | 2E-29  | 79 | - | -            | -2.942       |
| CYP707A7  | ABAH3_ORYSI | Absciscic acid 8'-hydroxylase 3                                                   | 1E-13  | 69 | - | <b>2.807</b> | -            |
| TMK1      | TMK1_ARATH  | Receptor protein kinase TMK1                                                      | 1E-19  | 76 | - | <b>2.737</b> | -            |
| OPR1      | OPR1_ARATH  | 12-oxophytodienoate reductase 1                                                   | 1E-43  | 72 | - | -            | -3.059       |
| SDI1      | SDI1_ARATH  | Protein SULFUR DEFICIENCY-INDUCED 1                                               | 3E-08  | 56 | - | <b>3.459</b> | <b>4.087</b> |
| At3g28050 | WTR18_ARATH | WAT1-related protein At3g28050                                                    | 5E-14  | 72 | - | <b>2.807</b> | -            |
| LECRK3    | LERK3_ORYSI | G-type lectin S-receptor-like serine/threonine-protein kinase LECRK3              | 4E-72  | 56 | - | -            | -3.498       |
| CYP77A3   | C77A3_SOYBN | Cytochrome P450 77A3                                                              | 2E-06  | 51 | - | -            | -2.831       |
| At3g13620 | PHSC_ARATH  | Probable polyamine transporter At3g13620                                          | 2E-28  | 69 | - | -3.170       | -            |
| At2g40270 | Y2027_ARATH | Inactive receptor-like serine/threonine-protein kinase At2g40270                  | 8E-06  | 62 | - | -            | -3.585       |
| BHLH41    | BH041_ARATH | Putative transcription factor bHLH041                                             | 2E-21  | 43 | - | -            | -4.858       |

|           |             |                                                                |       |    |              |              |              |
|-----------|-------------|----------------------------------------------------------------|-------|----|--------------|--------------|--------------|
| PER64     | PER64_ARATH | Peroxidase 64                                                  | 5E-59 | 60 | -            | -5.977       | -            |
| COBL4     | COBL4_ARATH | COBRA-like protein 4                                           | 2E-59 | 67 | -            | -4.087       | -5.087       |
| EDS1      | EDS1L_ARATH | Protein EDS1L                                                  | 2E-37 | 45 | -            | -            | -3.426       |
| PEPR1     | PEPR1_ARATH | Leucine-rich repeat receptor-like protein kinase PEPR1         | 3E-27 | 73 | <b>3.585</b> | <b>3.585</b> | <b>4.585</b> |
| Atlg48100 | PGLR4_ARATH | Polygalacturonase Atlg48100                                    | 3E-89 | 81 | -            | -            | <b>2.496</b> |
| UGT76E2   | U76E2_ARATH | UDP-glycosyltransferase 76E2                                   | 8E-56 | 70 | -            | -            | -2.802       |
| YAH3      | H32_LILLO   | Histone H3.2                                                   | 9E-42 | 99 | -            | -3.907       | -            |
| GRXC9     | GRXC9_ARATH | Glutaredoxin-C9                                                | 9E-16 | 55 | -            | -            | -3.104       |
| CYP74A    | CP74A_ARATH | Allene oxide synthase, chloroplastic                           | 2E-40 | 78 | -            | -            | -3.534       |
| GATA5     | GATA5_ARATH | GATA transcription factor 5                                    | 2E-42 | 74 | -            | -            | -3.028       |
| PDR1      | PDR1_TOBAC  | Pleiotropic drug resistance protein 1                          | 2E-33 | 80 | -            | -            | -2.572       |
| DTX27     | DTX27_ARATH | Protein DETOXIFICATION 27                                      | 3E-24 | 60 | -            | <b>3.763</b> | -            |
| EPS1      | EPS1_ARATH  | Protein ENHANCED PSEUDOMONAS SUSCEPTIBILITY 1                  | 2E-22 | 46 | -            | <b>3.654</b> | -            |
| AVT1B     | AVT1B_ARATH | Amino acid transporter AVT1B                                   | 5E-07 | 47 | -            | <b>2.761</b> | -            |
| CCR4      | ACCR4_ARATH | Serine/threonine-protein kinase-like protein CCR4              | 3E-83 | 40 | -            | -            | -5.017       |
| SAP12     | SAP12_ARATH | Zinc finger AN1 domain-containing stress-associated protein 12 | 2E-26 | 58 | -            | -            | -2.893       |
| WUN1      | WUN1_SOLTU  | Wound-induced protein 1                                        | 1E-25 | 51 | -            | <b>2.829</b> | -            |
| CYP707A2  | ABAH2_ARATH | Abscissic acid 8'-hydroxylase 2                                | 7E-26 | 92 | -            | <b>4.322</b> | -            |
| NAC090    | NAC90_ARATH | NAC domain-containing protein 90                               | 2E-43 | 67 | -            | -            | -3.491       |
| N/A       | ISPD_MENPI  | (-)-isopiperitenol/(-)-carveol dehydrogenase, mitochondrial    | 3E-46 | 62 | -            | -            | -3.644       |
| Dctpp1    | DCTP1_MOUSE | dCTP pyrophosphatase 1                                         | 5E-29 | 49 | -            | <b>2.791</b> | -            |
| LECRK41   | LRK41_ARATH | L-type lectin-domain containing receptor kinase IV.1           | 0E+00 | 67 | -            | -            | -3.940       |
| CRRSP38   | CRR38_ARATH | Cysteine-rich repeat secretory protein 38                      | 2E-08 | 44 | -            | -            | -4.115       |
| HMGB9     | HMGB9_ARATH | High mobility group B protein 9                                | 4E-13 | 66 | -            | -3.585       | -            |
| ERF112    | EF112_ARATH | Ethylene-responsive transcription factor ERF112                | 2E-17 | 83 | -            | -            | -4.658       |
| AMT2-1    | AMT21_ORYSJ | Ammonium transporter 2 member 1                                | 3E-43 | 90 | -            | -            | -3.280       |

|           |             |                                                                            |        |    |        |              |              |
|-----------|-------------|----------------------------------------------------------------------------|--------|----|--------|--------------|--------------|
| N/A       | POLX_TOBAC  | Retrovirus-related Pol polyprotein from transposon TNT 1-94                | 1E-36  | 49 | -      | -            | -4.459       |
| XTH22     | XTH22_ARATH | Xyloglucan endotransglucosylase/hydrolase protein 22                       | 8E-18  | 61 | -      | -            | -4.308       |
| SOT15     | SOT15_ARATH | Cytosolic sulfotransferase 15                                              | 5E-141 | 61 | -      | -3.262       | -4.655       |
| RSZ23     | RZP23_ORYSJ | Serine/arginine-rich splicing factor RSZ23                                 | 1E-04  | 94 | -      | <b>2.202</b> | <b>2.138</b> |
| SDR1      | SDR1_ARATH  | (+)-neomenthol dehydrogenase                                               | 3E-18  | 67 | -      | -            | <b>2.566</b> |
| RGA5      | RGA5R_ORYSJ | Disease resistance protein RGA5                                            | 3E-04  | 44 | -      | -            | -4.076       |
| DREB1D    | DRE1D_ARATH | Dehydration-responsive element-binding protein 1D                          | 2E-32  | 71 | -      | -            | -4.728       |
| At2g30020 | P2C25_ARATH | Probable protein phosphatase 2C 25                                         | 8E-32  | 74 | -      | -            | -3.983       |
| MYBAS1    | MYBA1_ORYSJ | Myb-related protein MYBAS1                                                 | 3E-09  | 74 | -      | <b>4.129</b> | -            |
| CBP60B    | CB60B_ARATH | Calmodulin-binding protein 60 B                                            | 3E-04  | 67 | -      | -            | -4.087       |
| CRK10     | CRK10_ARATH | Cysteine-rich receptor-like protein kinase 10                              | 1E-61  | 47 | -      | -            | -5.000       |
| At1g11050 | Y1105_ARATH | Probable receptor-like protein kinase At1g11050                            | 1E-45  | 81 | -      | -            | -4.000       |
| PRB1      | PRB1_ARATH  | Pathogenesis-related protein 1                                             | 6E-66  | 62 | -      | -            | -4.298       |
| GAE6      | GAE6_ARATH  | UDP-glucuronate 4-epimerase 6                                              | 6E-97  | 93 | -      | -2.855       | -            |
| PUB17     | PUB17_ARATH | U-box domain-containing protein 17                                         | 7E-35  | 70 | -      | -            | -3.233       |
| AMT3-3    | AMT33_ORYSJ | Ammonium transporter 3 member 3                                            | 6E-24  | 73 | -      | -3.322       | -            |
| N/A       | CRJ35_CRYJA | Pathogenesis-related thaumatin-like protein 3.5                            | 9E-08  | 79 | -      | <b>3.954</b> | -            |
| RL5       | RADL5_ARATH | Protein RADIALIS-like 5                                                    | 2E-28  | 70 | -      | -7.794       | -7.794       |
| GNS1      | E13B_PRUPE  | Glucan endo-1,3-beta-glucosidase, basic isoform                            | 1E-157 | 68 | -      | -            | -3.321       |
| SHT       | SHT_ARATH   | Spermidine hydroxycinnamoyl transferase                                    | 9E-28  | 47 | -      | -3.700       | -            |
| N/A       | C7A12_PANGI | Cytochrome P450 CYP736A12                                                  | 1E-70  | 63 | -      | -3.154       | -3.463       |
| CXE6      | CXE6_ARATH  | Probable carboxylesterase 6                                                | 8E-14  | 40 | -      | -            | -4.139       |
| At4g03230 | Y4230_ARATH | G-type lectin S-receptor-like serine/threonine-protein kinase<br>At4g03230 | 1E-46  | 70 | -      | -            | -3.066       |
| RL3       | RADL3_ARATH | Protein RADIALIS-like 3                                                    | 1E-28  | 75 | -      | -4.262       | -3.399       |
| GLR2.8    | GLR28_ARATH | Glutamate receptor 2.8                                                     | 4E-05  | 69 | -3.248 | -5.248       | -5.248       |

|           |             |                                                      |        |     |              |              |              |
|-----------|-------------|------------------------------------------------------|--------|-----|--------------|--------------|--------------|
| CYP78A5   | C78A5_ARATH | Cytochrome P450 78A5                                 | 6E-19  | 61  | <b>2.893</b> | -            | -            |
| PLP2      | PLP2_ARATH  | Patatin-like protein 2                               | 1E-44  | 66  | -            | -            | -4.209       |
| LAC22     | LAC22_ORYSJ | Laccase-22                                           | 4E-138 | 64  | -            | -            | -5.183       |
| At4g14490 | Y4449_ARATH | FHA domain-containing protein At4g14490              | 1E-25  | 53  | -            | <b>2.096</b> | -            |
| SEOA      | SEOA_ARATH  | Protein SIEVE ELEMENT OCCLUSION A                    | 8E-21  | 49  | -            | -            | -3.524       |
| GDH2      | DHE2_ARATH  | Glutamate dehydrogenase 2                            | 7E-43  | 93  | <b>3.322</b> | <b>5.087</b> | <b>3.807</b> |
| CAO       | CAO_ORYSJ   | Chlorophyllide a oxygenase, chloroplastic            | 2E-08  | 100 | -            | -            | <b>4.248</b> |
| AATP1     | ASD_ARATH   | AAA-ATPase ASD, mitochondrial                        | 3E-15  | 50  | -            | -            | -4.807       |
| LECRK91   | LRK91_ARATH | L-type lectin-domain containing receptor kinase IX.1 | 4E-33  | 68  | -            | -3.503       | -5.087       |
| SIT1      | SIT1_ORYSJ  | L-type lectin-domain containing receptor kinase SIT1 | 9E-21  | 55  | -            | -            | -3.051       |
| WAKL6     | WAKLF_ARATH | Wall-associated receptor kinase-like 6               | 1E-07  | 53  | -            | -3.524       | -            |
| IRX15-L   | IX15L_ARATH | Protein IRX15-LIKE                                   | 3E-25  | 61  | -            | -2.974       | -3.459       |
| HMG2      | HMDH2_GOSHI | 3-hydroxy-3-methylglutaryl-coenzyme A reductase 2    | 2E-41  | 64  | -            | -            | -2.749       |
| CML37     | CML37_ARATH | Calcium-binding protein CML37                        | 1E-19  | 50  | -            | -            | -3.600       |
| SERK4     | SERK4_ARATH | Somatic embryogenesis receptor kinase 4              | 1E-05  | 40  | -            | -            | -3.970       |
| N/A       | LECS_VATMA  | Seed lectin                                          | 2E-16  | 40  | -            | -            | -4.700       |
| At1g30200 | FB19_ARATH  | F-box protein At1g30200                              | 7E-06  | 40  | -            | -            | -3.152       |
| UCH2      | UCH2_ARATH  | Ubiquitin carboxyl-terminal hydrolase 2              | 1E-09  | 93  | -            | -            | -3.645       |
| PHT1-12   | PT112_ORYSJ | Probable inorganic phosphate transporter 1-12        | 2E-32  | 79  | -            | -            | -3.577       |

---
